# Supplementary material for: Lugdunin amplifies innate immune responses in the skin in synergy with host- and microbiota-derived factors
Source: PubMed Central journal article supplement (PMC6588697; doi:10.1038/s41467-019-10646-7), 2019-06-21
Supplement: 41467_2019_10646_MOESM1_ESM.pdf [file 41467_2019_10646_MOESM1_ESM.pdf]

1 **Supplementary Information**

2

3

4 **Lugdunin amplifies innate immune responses in the skin in synergy with host-**  
5 **and microbiota-derived factors**

6 **Bitschar et al.**

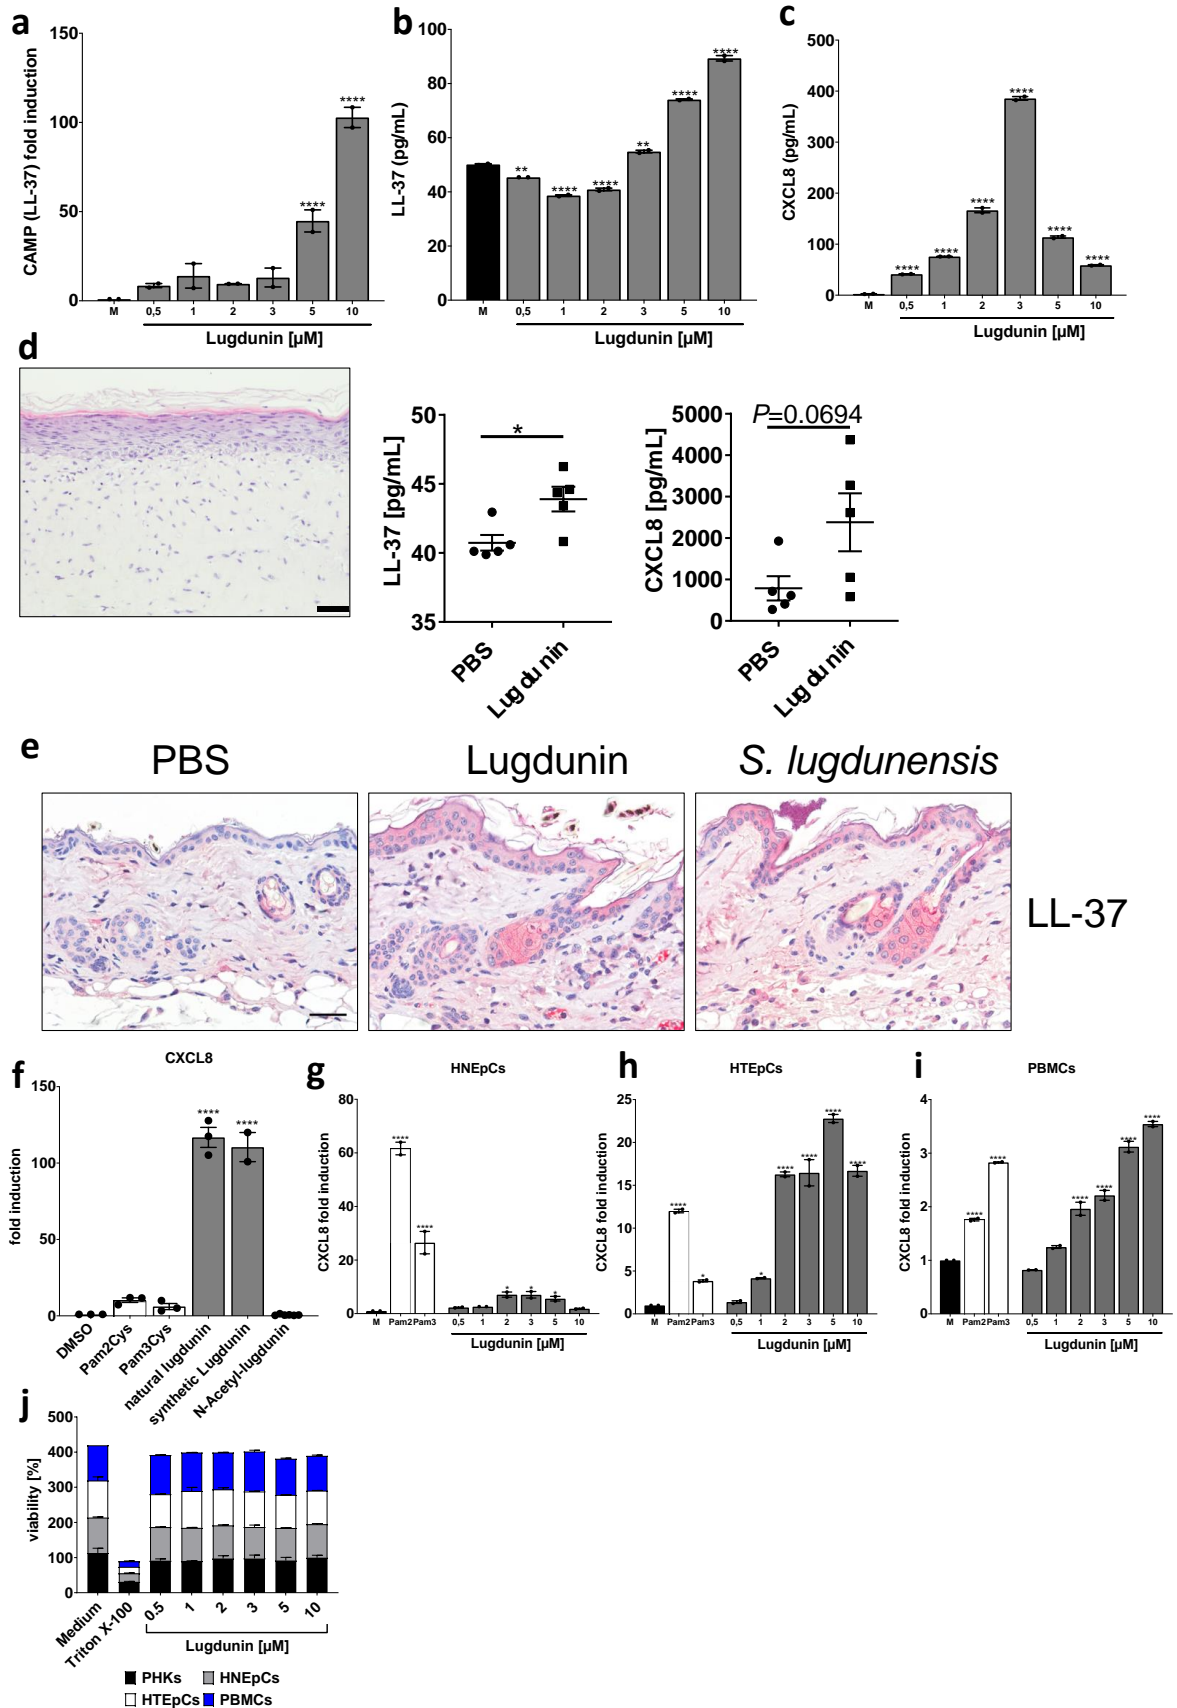

7

8 **Supplementary Figure 1: Lugdunin-induced LL-37 is concentration-dependent**  
 9 **and CXCL8 is cell type-specific**

10 **a:** PHKs were treated with increasing concentrations of lugdunin for 24 hours and  
11 subsequently expression of CAMP (LL-37) was analyzed and normalized to actin.  
12 Shown is one representative experiment of three independent experiments with two  
13 technical replicates each +/-s.e.m. Black bar: medium control.

14 **b+c:** PHKs were treated with increasing concentrations of lugdunin for 24 hours and  
15 subsequently the concentration of LL-37 and CXCL8 in the supernatant was analyzed.  
16 Shown is one representative experiment of three independent experiments, each with  
17 two technical replicates +/-s.e.m.

18 **d:** Representative hematoxylin-eosin-stained paraffin-embedded human 3D skin  
19 equivalent. Scale bar = 100  $\mu$ M. 1.5  $\mu$ g lugdunin or PBS was topically applied onto 3D  
20 skin equivalents. After 24 hours, the concentration of LL-37 and CXCL8 in the  
21 supernatant was analyzed. One dot represents one skin equivalent. Shown is the  
22 mean percentage +/- s.e.m. Significant differences to control treatments were analyzed  
23 by an unpaired two-tailed t-test (\* $P$ <0.05).

24 **e:** Representative LL-37-stained paraffin-embedded mouse skin sections. Scale bar =  
25 100  $\mu$ M.

26 **f:** PHKs were treated with 2  $\mu$ M natural lugdunin, synthetic lugdunin, N-Acetyl lugdunin  
27 (grey bars) or 100 ng/mL Pam2Cys or Pam3Cys (white bars) as positive control for 5  
28 hours and subsequently expression of CXCL8 was analyzed and normalized to actin.  
29 Black bar: DMSO control. Shown is one representative experiment of three  
30 independent experiments with at least two technical replicates +/-s.e.m.

31 **g+h+i:** HNEpCs (**b**), HTEpCs (**c**) or PBMCs (**d**) were treated with increasing  
32 concentrations of lugdunin (grey bars) or 100 ng/mL Pam2Cys or Pam3Cys (white  
33 bars) as positive controls for 5 hours and subsequently expression of CXCL8 was  
34 analyzed and normalized to actin. Black bar: medium control. Shown is one  
35 representative experiment of three independent experiments with two technical  
36 replicates +/-s.e.m. Significant differences to control treatments were analyzed by  
37 ordinary one-way ANOVA followed by Dunnett's multiple comparisons test (\* $P$ <0.05;  
38 \*\* $P$ <0.01; \*\*\* $P$ <0.001; \*\*\*\* $P$ <0.0001).

39 **j:** PHKs, HNEpCs, HTEpCs or PBMCs were treated with increasing concentrations of  
40 lugdunin or 0.1% Triton X-100 for 24 hours and subsequently incubated with 4-  
41 methylumbelliferyl heptanoate. Treatment with 0.1% Triton X-100 was used as  
42 negative control. Data were normalized to the untreated control. Shown is one

43 representative experiment of three independent experiments with two technical  
44 replicates  $\pm$  s.e.m. Source data are provided as a Source Data file.

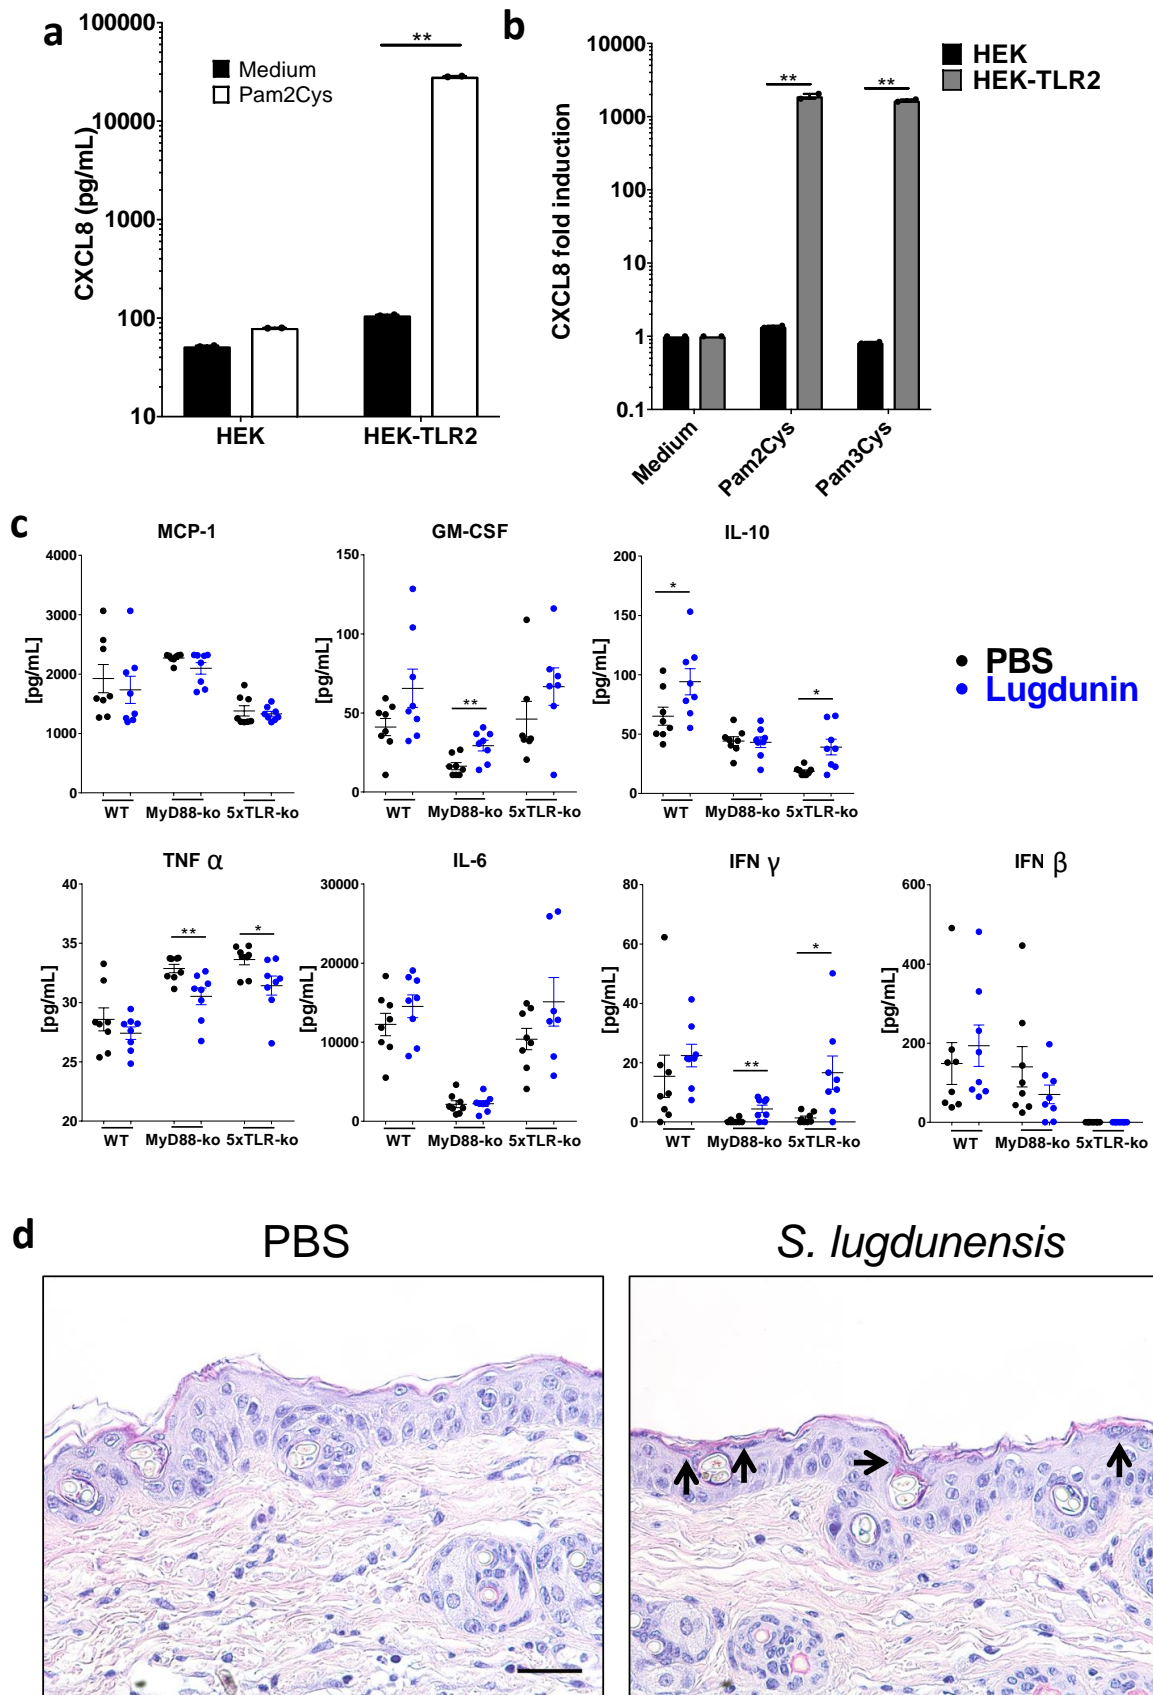

45

46

**Supplementary Figure 2: CXCL8 controls and other cytokines in mouse skin**

47

**a:** HEK-control cells or HEK-TLR2 cells were treated with 100 ng/mL Pam2Cys for 5 hours and subsequently the CXCL8 concentration in the supernatant was analyzed.

48

49 Shown is one representative experiment of three independent experiments with two  
50 technical replicates +/-s.e.m.

51 **b:** HEK-control cells or HEK-TLR2 cells were treated with 100 ng/mL Pam2Cys or  
52 Pam3Cys for 5 hours and subsequently expression of CXCL8 was analyzed. Shown  
53 is one representative experiment of three independent experiments with two technical  
54 replicates +/-s.e.m.

55 **c:** Shown are the mean concentrations of the indicated cytokines in the supernatant of  
56 the organ skin culture of two skin punches from four mice each +/- s.e.m.

57 Significant differences to control treatments were analyzed by an unpaired two-tailed  
58 t-test (\* $P < 0.05$ ; \*\* $P < 0.01$ ; \*\*\* $P < 0.001$ ; \*\*\*\* $P < 0.0001$ ).

59 **d:** Representative hematoxylin-eosin-stained paraffin-embedded mouse skin sections.

60 Scale bar = 100  $\mu$ M.

61 Source data are provided as a Source Data file.

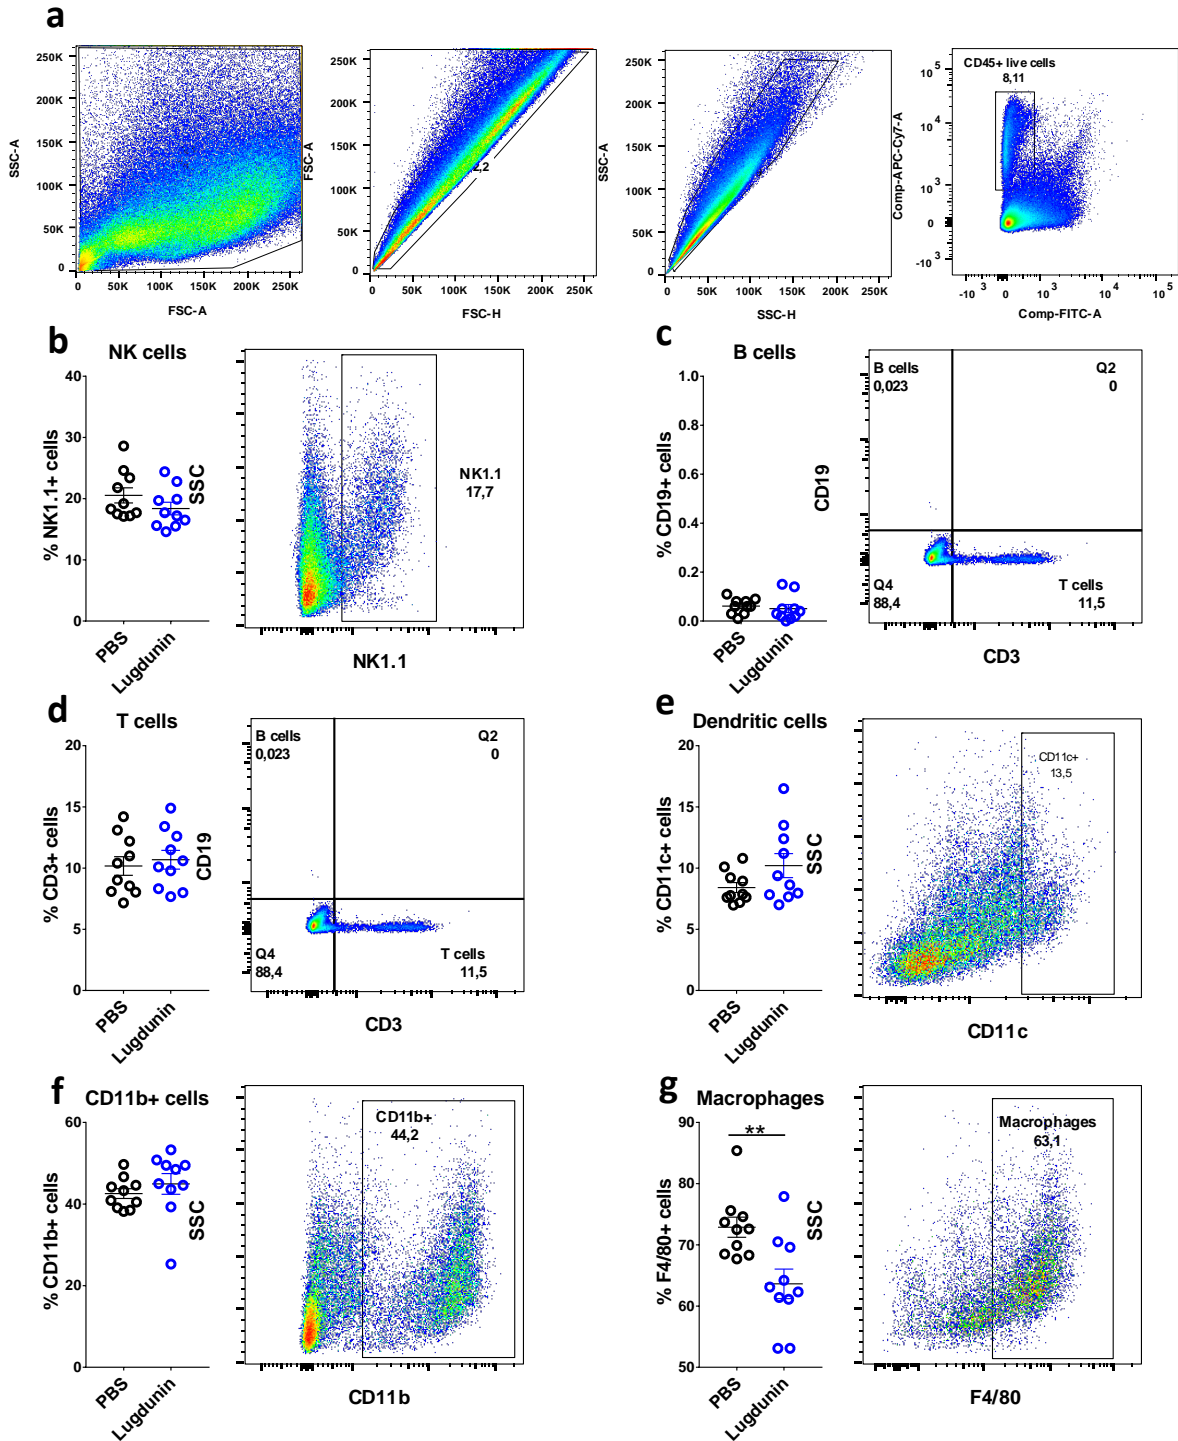

62

63 **Supplementary Figure 3: Gating strategy for immune cell analysis in mouse skin**

64 **a:** Gating strategy for live CD45+ cells. Gating for the different immune cell subsets  
 65 pre-gated on live CD45+ cells: NK cells (**b**); B cells (**c**); T cells (**d**); Dendritic cells (**e**);  
 66 CD11b+ cells (**f**); Pregated on CD11b+ CD45+ live cells presented on Figure 3d.  
 67 Macrophages (**g**). Shown is the mean percentage of indicated immune cells in mouse  
 68 skin of 10 C5BL/6 WT mice +/- s.e.m. One dot represents one mouse.

69 Source data are provided as a Source Data file.

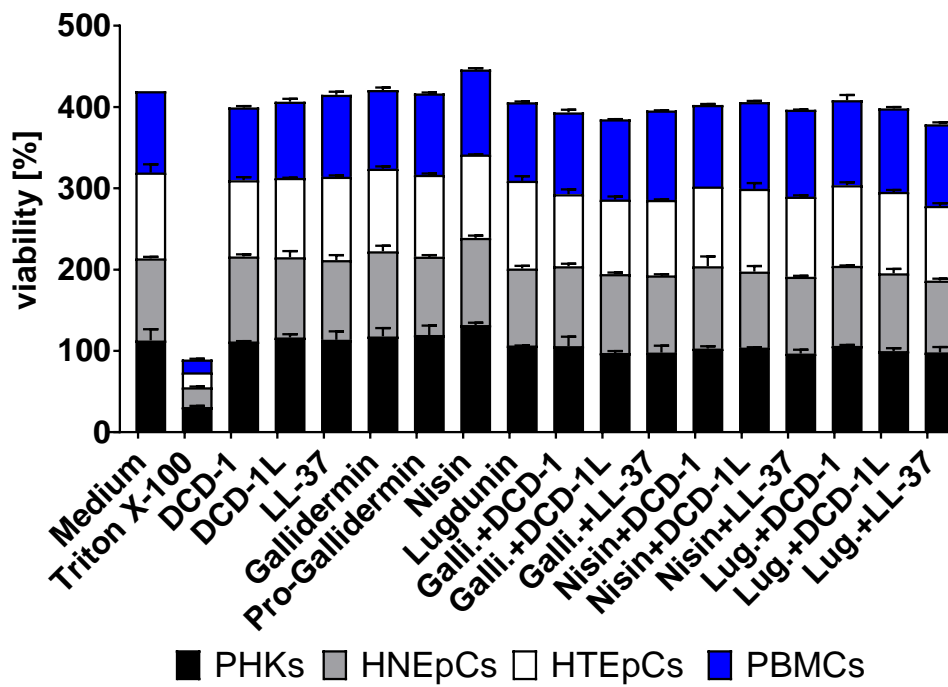

71

72 **Supplementary Figure 4: Viability of primary cells upon AMP treatment**

73 PHKS, HNEpCs, HTEpCs or PBMCs were treated with 2  $\mu$ M human AMPs, 2  $\mu$ M  
 74 lugdunin, 0.8  $\mu$ M of indicated bacteriocins or the correspondent peptide combinations  
 75 for 24 hours. Subsequently, cells were incubated with 4-methylumbelliferyl heptanoate  
 76 and viability was calculated. Treatment with 0.1 % Triton X-100 was used as negative  
 77 control. Data were normalized to the untreated control. Shown is one representative  
 78 experiment of three independent experiments with two technical replicates +/-s.e.m.  
 79 Source data are provided as a Source Data file.

80



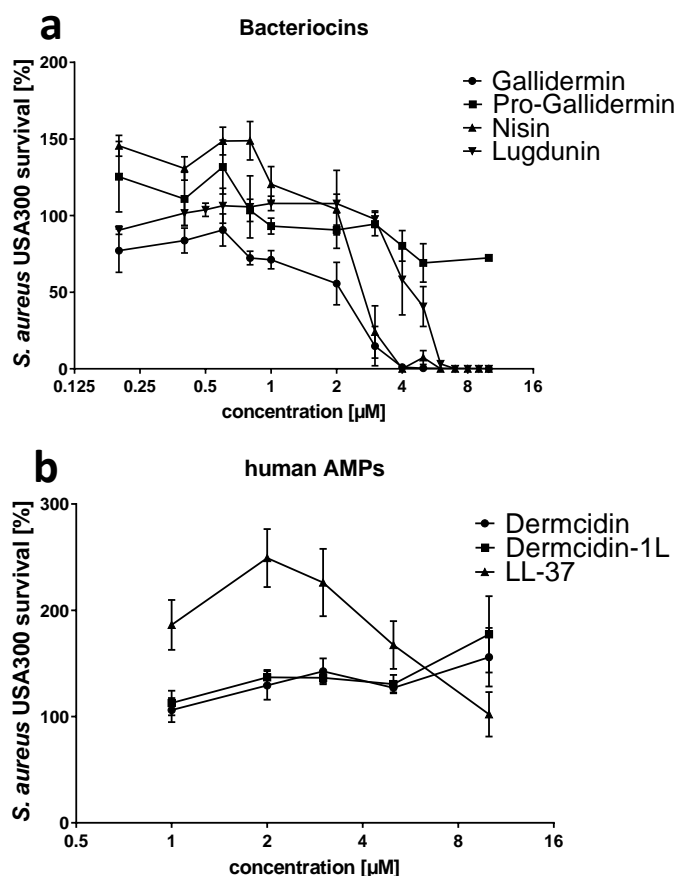

81  
 82 **Supplementary Figure 5: Determination of minimal bactericidal concentrations**  
 83 **of peptides used against *S. aureus* USA300**

84 **a+b:**  $3 \times 10^6$  logarithmically grown *S. aureus* were incubated with indicated  
 85 concentrations of the bacteriocins (pro)-gallidermin, nisin and lugdunin (**a**) or the  
 86 human AMPs Dermcidin-1(L) and LL-37 (**b**) in PBS containing 0.1% TSB at 37 °C  
 87 orbital shaking. After 3 hours of incubation several dilutions of the bacterial  
 88 suspensions were plated onto TSB agar plates and incubated over night at 37 °C. The  
 89 next day *S. aureus* CFU were counted. Each experiment was performed in triplicates.  
 90 Data represent the mean percentage of *S. aureus* survival measured in CFU and  
 91 normalized to the untreated control. Data represent the mean of at least three  
 92 independent experiments +/- s.e.m. Source data are provided as a Source Data file.

93

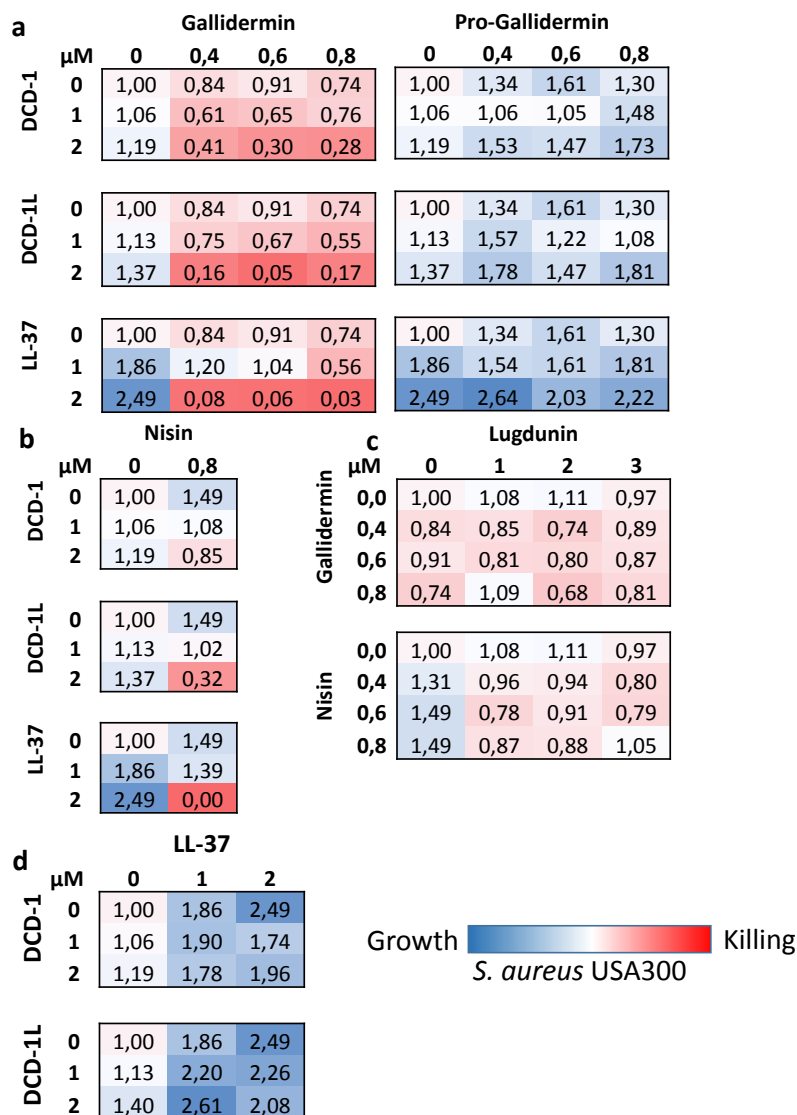

94

95 **Supplementary Figure 6: Combination treatments of *S. aureus* with different**  
 96 **AMPs and bacteriocins**

97  $3 \times 10^6$  logarithmically grown *S. aureus* were incubated with indicated combinations of  
 98 the bacteriocins (pro)-gallidermin (a) or nisin (b) with human AMPs or with  
 99 combinations of lugdunin with gallidermin and nisin (c) or with combinations of DCD-  
 100 1(L) and LL-37 (d) in PBS containing 0.1% TSB at 37 °C orbital shaking. After 3 hours  
 101 of incubation several dilutions of the bacterial suspensions were plated onto TSB agar  
 102 plates and incubated over night at 37 °C. The next day *S. aureus* CFU were counted.  
 103 Each experiment was performed in triplicates. Data represent the mean percentage of  
 104 CFU normalized to the untreated control. Data represent the mean of at least three  
 105 independent experiments.

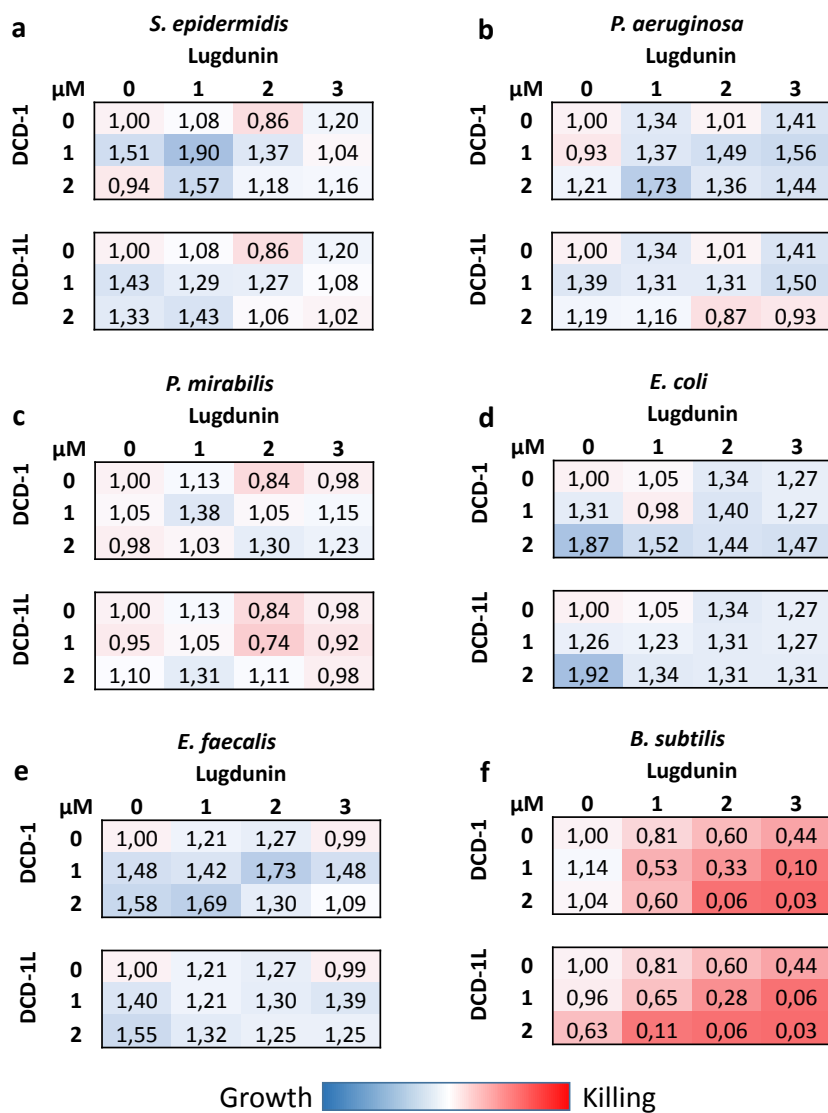

106

107 **Supplementary Figure 7: Efficiency of Lugdunin and DCD-1(L) combinations in**  
 108 **bacteria killing**

109  $3 \times 10^6$  logarithmically grown bacteria were incubated with indicated combinations of  
 110 lugdunin and DCD-1(L) in PBS containing 0.1% TSB at 37 °C orbital shaking. After 3  
 111 hours of incubation several dilutions of the bacterial suspensions were plated onto TSB  
 112 agar plates and incubated over night at 37 °C. The next day bacterial CFU were  
 113 counted. Each experiment was performed in triplicates. Data represent the mean  
 114 percentage of CFU normalized to the untreated control. Data represent the mean of at  
 115 least three independent experiments.

116 **Supplementary Table 1: List of Primers used in this study**

| <b>Primer</b> | <b>Sequence</b>        | <b>Annealing Temp</b> |
|---------------|------------------------|-----------------------|
| ACTB fw       | TTGTTACAGGAAGTCCCTTGCC | 60 °C                 |
| ACTB rv       | ATGCTATCACCTCCCCTGTGTG |                       |
| CXCL8 fw      | AGACAGCAGAGCACACAAGC   | 60 °C                 |
| CXCL8 rv      | ATGGTTCCTTCCGGTGGT     |                       |
| CAMP fw       | TCGGATGCTAACCTCTACCG   | 58 °C                 |
| CAMP rv       | GTCTGGGTCCCCATCCAT     |                       |
| DEFB1 fw      | TGTCTGAGATGGCCTCAGGT   | 60 °C                 |
| DEFB1 rv      | GGGCAGGCAGAATAGAGACA   |                       |
| DEFB4A fw     | TCAGCCATGAGGGTCTTGTA   | 58 °C                 |
| DEFB4A rv     | GGATCGCCTATACCACCAA    |                       |
| DEFB103A fw   | TTCTGTTTGCTTTGCTCTTCC  | 62 °C                 |
| DEFB103 rv    | CGCCTCTGACTCTGCAATAAT  |                       |
| RNASE7 fw     | GAAGACCAAGCGCAAAGC     | 58 °C                 |
| RNASE7 rv     | CAGCAGAAGCAGCAGAAGG    |                       |

117
